# Supplementary material
Source: PubMed Central journal article supplement (PMC4085768)
Supplement: cr201474x1.pdf [file cr201474x1.pdf]

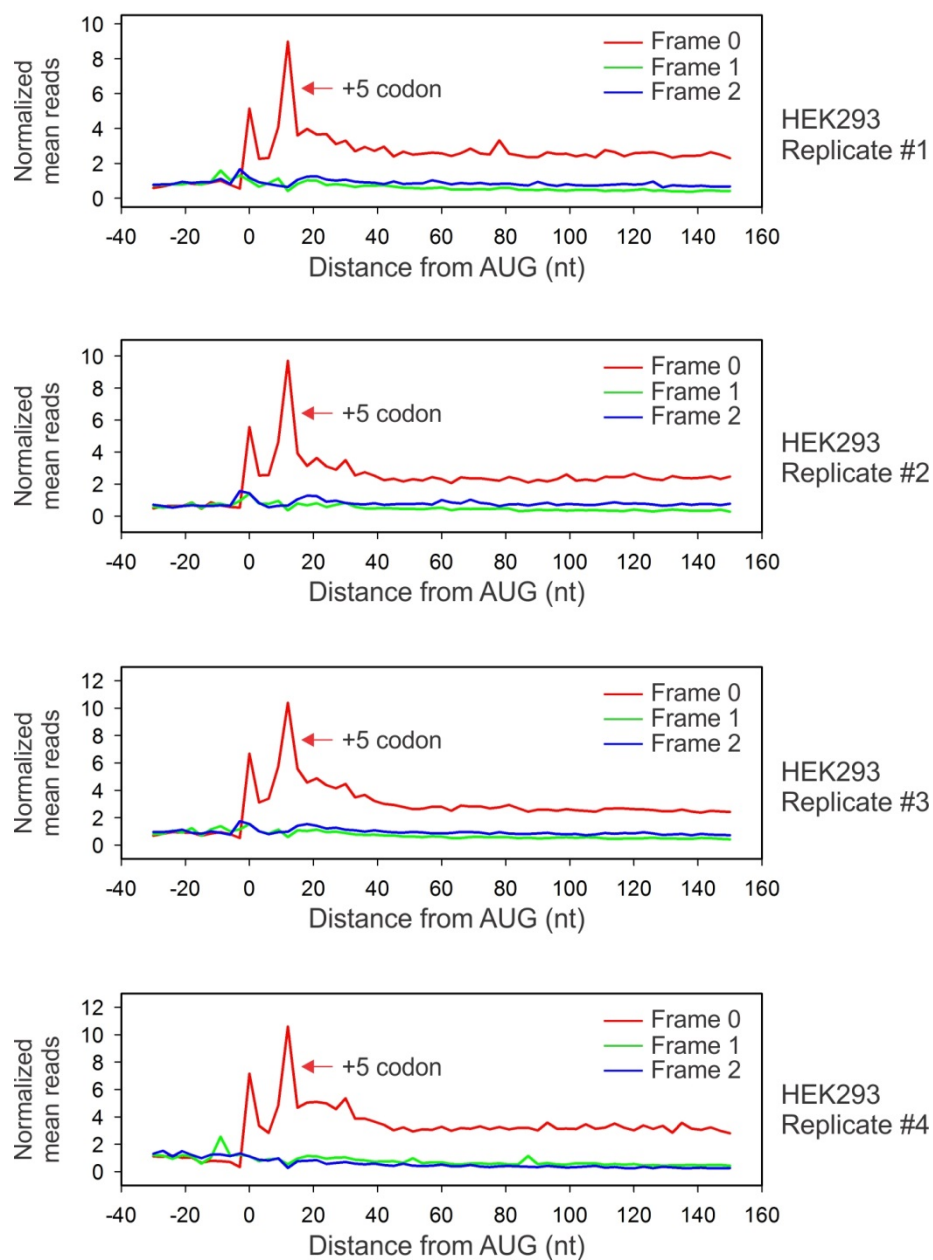

**Figure S1.** Reproducibility of post-initiation pausing in HEK293 cells. A total of 4 independent Ribo-seq replicates are shown. All mapped reads are aligned at the annotated start codon AUG and stratified by frames. The reads density at each nucleotide position is averaged using the P-site of RPFs. The red arrow indicates the 5th codon position.
