# Supplementary material
Source: PubMed Central journal article supplement (PMC4085768)
Supplement: cr201474x2.pdf [file cr201474x2.pdf]

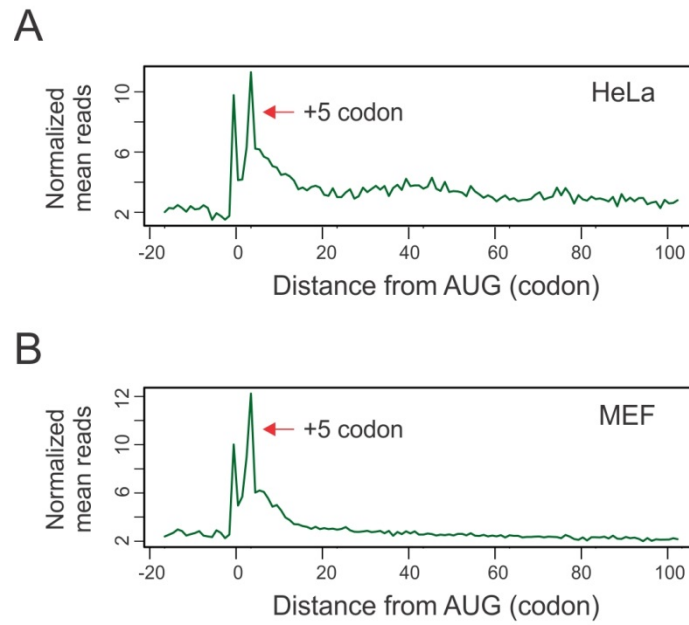

**Figure S2.** Reproducibility of post-initiation pausing in HeLa (A) and MEF cells (B). All mapped reads are aligned at the annotated start codon AUG. The reads density at each codon position is averaged using the P-site of RPFs. The red arrow indicates the 5th codon position.
