# Supplementary material
Source: PubMed Central journal article supplement (PMC4085768)
Supplement: cr201474x3.pdf [file cr201474x3.pdf]

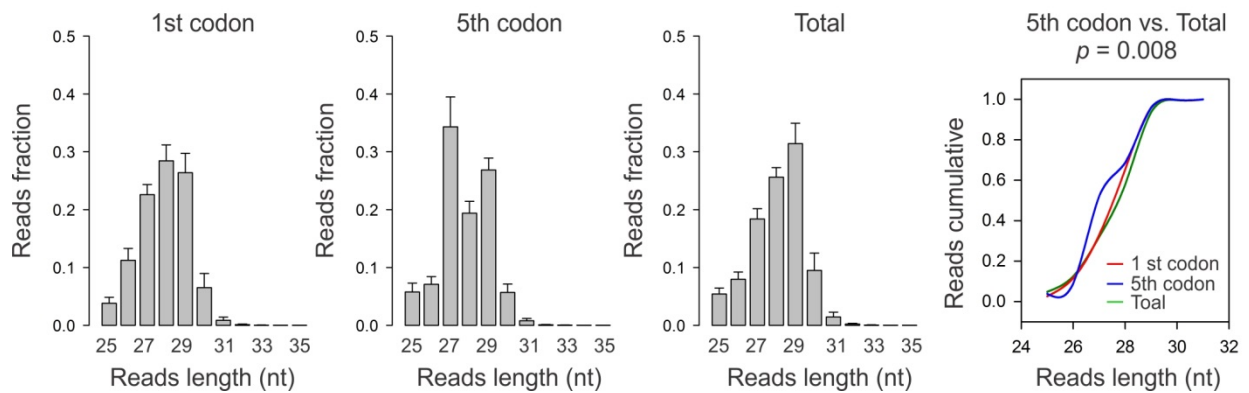

**Figure S3.** Length distribution of RPF reads mapped to the 1st (AUG) codon, 5th codon, or the entire CDS. Only the reads with 25 – 35 nt were shown for clarity. Means  $\pm$  SEM,  $n = 4$ . The right panel shows the Kolmogrov-Smirnov test with  $p = 0.008$  between 5th codon and total.
