# Supplementary material
Source: PubMed Central journal article supplement (PMC4085768)
Supplement: cr201474x5.pdf [file cr201474x5.pdf]

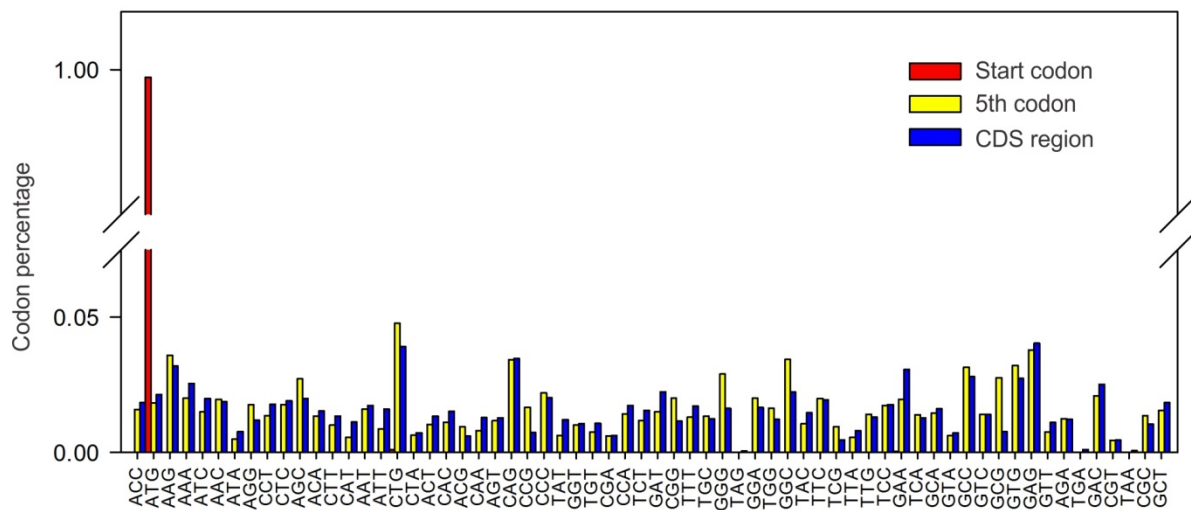

**Figure S5.** Sequence composition for the 1st (AUG) codon, 5th codon, and the entire CDS region in human genome.
