# Supplementary material
Source: PubMed Central journal article supplement (PMC4085768)
Supplement: cr201474x8.pdf [file cr201474x8.pdf]

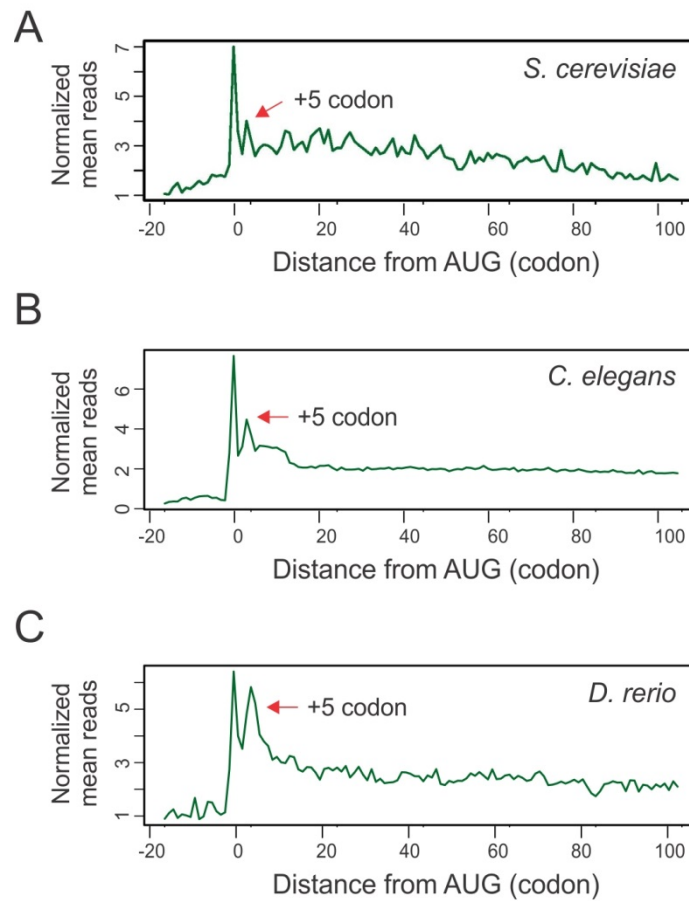

**Figure S8.** Post-initiation pausing in other eukaryotic cell species, including budding yeast *S. cerevisiae* (A), nematode *C. elegans* (B), and zebrafish *D. rerio* (C). All mapped reads are aligned at the annotated start codon AUG. The reads density at each codon position is averaged using the P-site of RPFs. The red arrow indicates the 5th codon position.
