# Supplementary material
Source: PubMed Central journal article supplement (PMC4085768)
Supplement: cr201474x9.pdf [file cr201474x9.pdf]

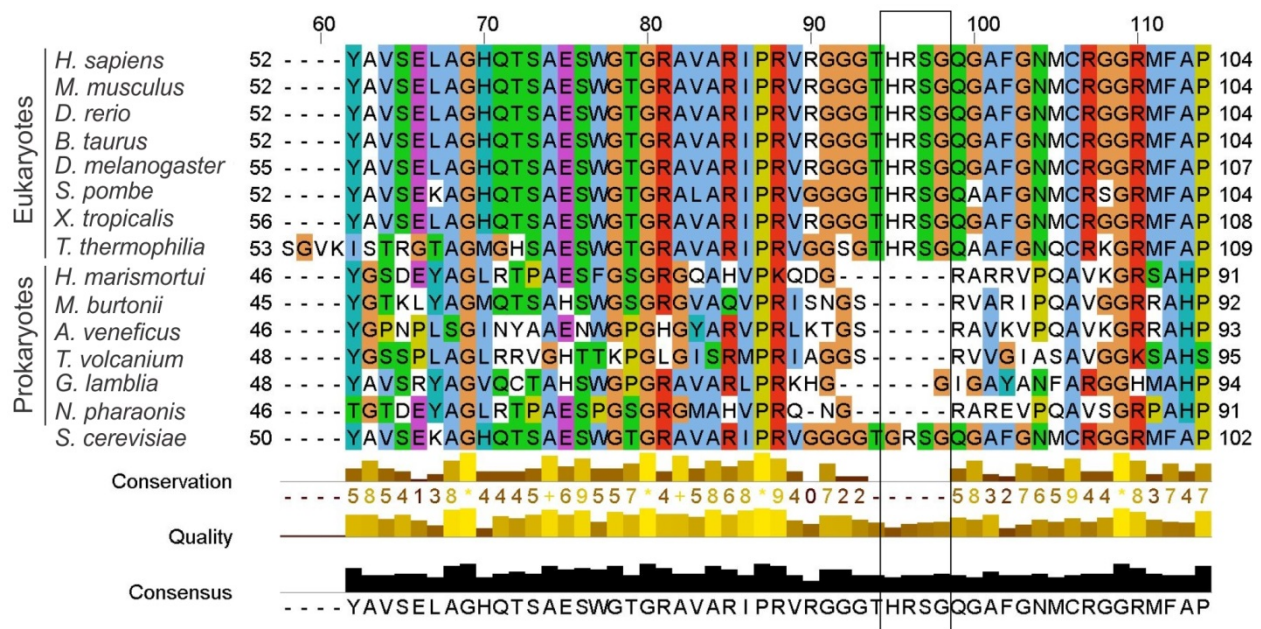

**Figure S9.** Evolutionary conservation analysis of RPL4 in both eukaryotes and prokaryotes. The eukaryotic-specific region (HRSG) is highlighted in the box.
