# Supplementary material
Source: PubMed Central journal article supplement (PMC4085768)
Supplement: cr201474x10.pdf [file cr201474x10.pdf]

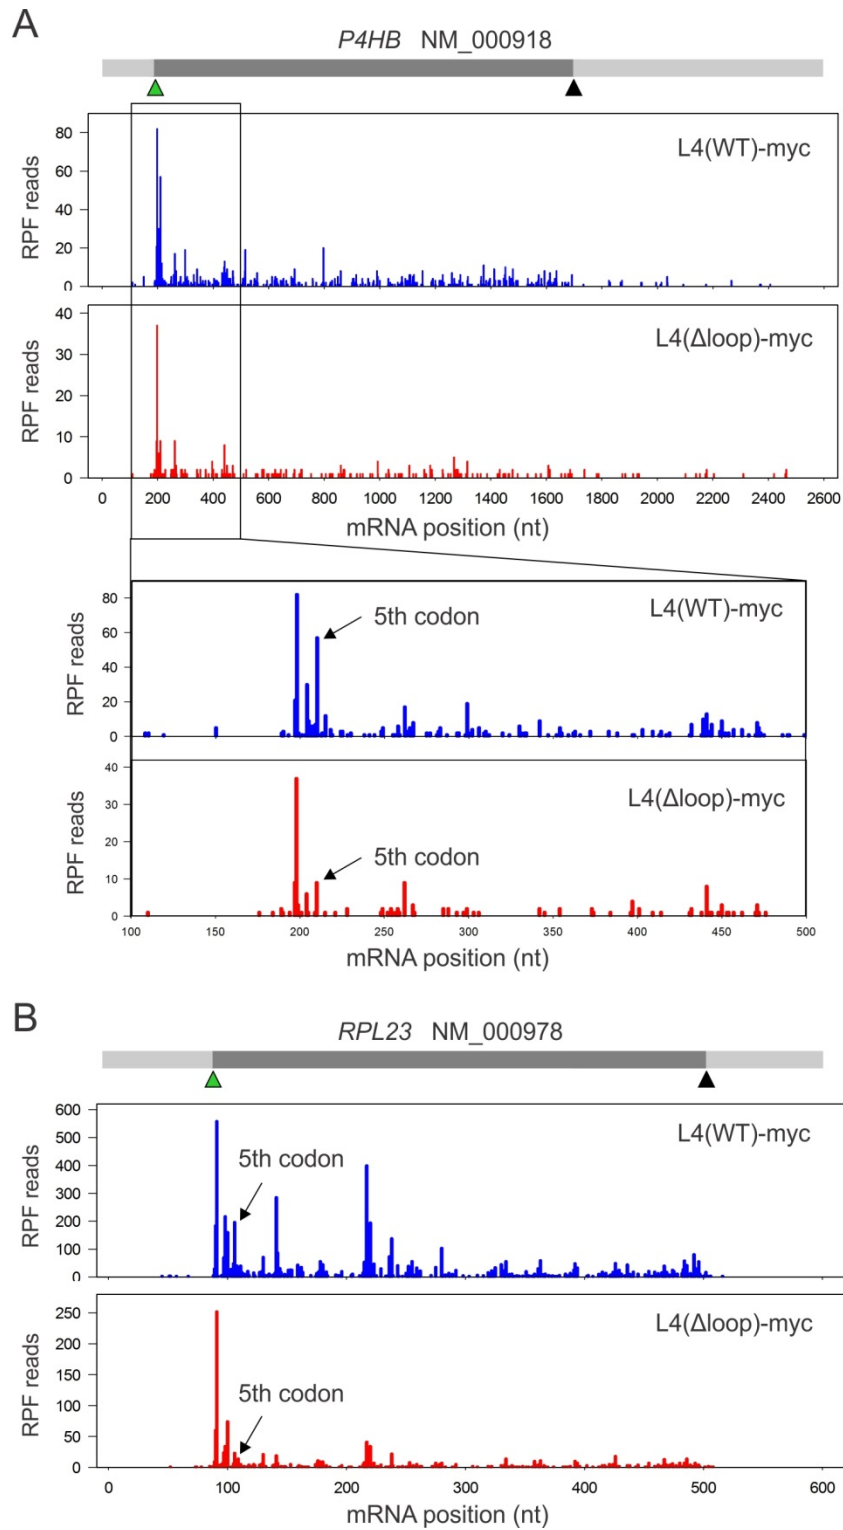

**Figure S10.** Examples of transcripts whose post-initiation pausing is reduced when translated by ribosomes bearing RPL4( $\Delta$ loop). Both the long gene *P4HB* (**A**) and short gene *RPL23* (**B**) are shown with footprints derived from RPL4(WT) (blue) or RPL4( $\Delta$ loop) (red).
