# Supplementary material
Source: PubMed Central journal article supplement (PMC4085768)

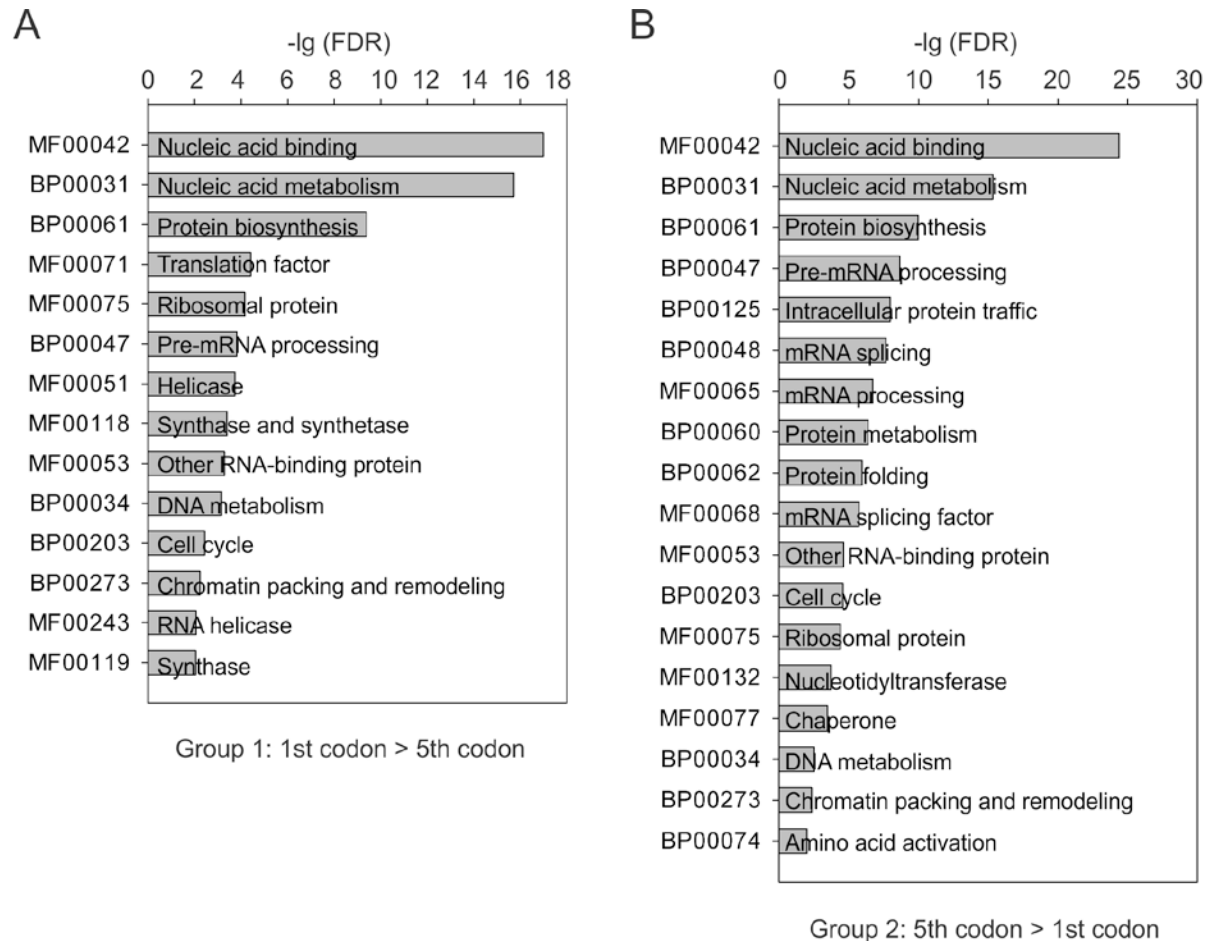

**Figure S6.** GO term analysis for gene groups with weak (A) and strong (B) post-initiation pausing.

Supplement: cr201474x6.pdf [file cr201474x6.pdf]
